# Supplementary material
Source: PubMed Central journal article supplement (PMC6582746)
Supplement: gutjnl-2017-315490supp003.pdf [file gutjnl-2017-315490supp003.pdf]

## Supplementary Table 1: Top Altered Pathways (Hallmarks) Found by GSEA

| NAME                                    | ES         | NES        | NOM p-val   | FDR q-val | FWER p-val |
|-----------------------------------------|------------|------------|-------------|-----------|------------|
| HALLMARK_MYC_TARGETS_V2                 | 0.60538054 | 1.6276323  | 0           | 0.007223  | 0.008      |
| HALLMARK_COAGULATION                    | 0.5158395  | 1.4932013  | 0           | 0.040666  | 0.081      |
| HALLMARK_DNA_REPAIR                     | 0.45669493 | 1.33333    | 0.013319672 | 0.287705  | 0.612      |
| HALLMARK_MYC_TARGETS_V1                 | 0.4408033  | 1.3066767  | 0.009063444 | 0.304192  | 0.737      |
| HALLMARK_IL2_STAT5_SIGNALING            | 0.40566048 | 1.2073549  | 0.064386316 | 0.870637  | 0.995      |
| HALLMARK_ALLOGRAFT_REJECTION            | 0.39063314 | 1.1652709  | 0.11155779  | 1         | 1          |
| HALLMARK_COMPLEMENT                     | 0.38741273 | 1.1414809  | 0.15126903  | 1         | 1          |
| HALLMARK_OXIDATIVE_PHOSPHORYLATION      | 0.37742546 | 1.121301   | 0.20101011  | 1         | 1          |
| HALLMARK_APICAL_SURFACE                 | 0.43187517 | 1.1201342  | 0.29477197  | 1         | 1          |
| HALLMARK_EPITHELIAL_MESENCHYMAL_TRANSIT | 0.37593582 | 1.1175237  | 0.21370968  | 1         | 1          |
| HALLMARK_P53_PATHWAY                    | 0.37350225 | 1.1085943  | 0.2201005   | 1         | 1          |
| HALLMARK_CHOLESTEROL_HOMEOSTASIS        | 0.39848816 | 1.1032214  | 0.29306722  | 0.962513  | 1          |
| HALLMARK_APOPTOSIS                      | 0.37412247 | 1.1029364  | 0.25583756  | 0.890098  | 1          |
| HALLMARK_HYPOXIA                        | 0.36348468 | 1.0855932  | 0.28241205  | 0.943208  | 1          |
| HALLMARK_SPERMATOGENESIS                | 0.37099823 | 1.078535   | 0.3119266   | 0.925385  | 1          |
| HALLMARK_INFLAMMATORY_RESPONSE          | 0.35054496 | 1.0518492  | 0.35656565  | 1         | 1          |
| HALLMARK_PANCREAS_BETA_CELLS            | 0.40927812 | 1.0508529  | 0.4127708   | 0.984789  | 1          |
| HALLMARK_REACTIVE_OXIGEN_SPECIES_PATHW  | 0.39641365 | 1.0387547  | 0.42857143  | 0.998277  | 1          |
| HALLMARK_XENOBIOTIC_METABOLISM          | 0.347125   | 1.0330001  | 0.41893253  | 0.979746  | 1          |
| HALLMARK_UV_RESPONSE_UP                 | 0.35012487 | 1.0267731  | 0.4336373   | 0.963679  | 1          |
| HALLMARK_ADIPOGENESIS                   | 0.33963317 | 1.0117598  | 0.48738647  | 0.994493  | 1          |
| HALLMARK_PEROXISOME                     | 0.35077068 | 1.0042886  | 0.48715314  | 0.984671  | 1          |
| HALLMARK_KRAS_SIGNALING_UP              | 0.33394197 | 0.98538816 | 0.5497487   | 1         | 1          |
| HALLMARK_GLYCOLYSIS                     | 0.3283518  | 0.97529405 | 0.582495    | 1         | 1          |
| HALLMARK_APICAL_JUNCTION                | 0.324182   | 0.9622982  | 0.5866935   | 1         | 1          |
| HALLMARK_KRAS_SIGNALING_DN              | 0.3181483  | 0.949984   | 0.6487854   | 1         | 1          |
| HALLMARK_HEDGEHOG_SIGNALING             | 0.379662   | 0.94853055 | 0.58796823  | 1         | 1          |
| HALLMARK_MITOTIC_SPINDLE                | 0.30376834 | 0.9016724  | 0.75075376  | 1         | 1          |
| HALLMARK_IL6_JAK_STAT3_SIGNALING        | 0.31807417 | 0.89518476 | 0.68393236  | 1         | 1          |
| HALLMARK_BILE_ACID_METABOLISM           | 0.29928148 | 0.8595257  | 0.7792746   | 1         | 1          |

|                                     |            |            |           |         |   |
|-------------------------------------|------------|------------|-----------|---------|---|
| HALLMARK_FATTY_ACID_METABOLISM      | 0.28964478 | 0.851636   | 0.8235294 | 1       | 1 |
| HALLMARK_MYOGENESIS                 | 0.28270015 | 0.841054   | 0.8663968 | 1       | 1 |
| HALLMARK_WNT_BETA_CATENIN_SIGNALING | 0.3243181  | 0.84052074 | 0.7394286 | 1       | 1 |
| HALLMARK_UV_RESPONSE_DN             | 0.28026488 | 0.82431847 | 0.8575788 | 1       | 1 |
| HALLMARK_TNFA_SIGNALING_VIA_NFKB    | 0.2771199  | 0.8241499  | 0.8891129 | 1       | 1 |
| HALLMARK_PROTEIN_SECRETION          | 0.28308353 | 0.8005513  | 0.8543388 | 1       | 1 |
| HALLMARK_E2F_TARGETS                | 0.26323238 | 0.77946323 | 0.9366197 | 1       | 1 |
| HALLMARK_UNFOLDED_PROTEIN_RESPONSE  | 0.2738264  | 0.77696174 | 0.8917526 | 1       | 1 |
| HALLMARK_ESTROGEN_RESPONSE_EARLY    | 0.24998467 | 0.7386228  | 0.9769308 | 1       | 1 |
| HALLMARK_ESTROGEN_RESPONSE_LATE     | 0.24042875 | 0.72114694 | 0.9757576 | 1       | 1 |
| HALLMARK_TGF_BETA_SIGNALING         | 0.26075536 | 0.69803345 | 0.9256017 | 1       | 1 |
| HALLMARK_PI3K_AKT_MTOR_SIGNALING    | 0.22416037 | 0.6395408  | 0.9927159 | 1       | 1 |
| HALLMARK_MTORC1_SIGNALING           | 0.19858561 | 0.5916655  | 1         | 1       | 1 |
| HALLMARK_G2M_CHECKPOINT             | 0.18722288 | 0.5564647  | 1         | 0.99861 | 1 |

## Supplementary Table 2: Top Altered Pathways (All included) Found by GSEA

| NAME                                       | ES         | NES       | NOM p-val | FDR q-val  | FWER p-val |
|--------------------------------------------|------------|-----------|-----------|------------|------------|
| REACTOME_PEPTIDE_CHAIN_ELONGATION          | 0.8821209  | 2.4668512 | 0         | 0          | 0          |
| KEGG_RIBOSOME                              | 0.85542816 | 2.3796058 | 0         | 0          | 0          |
| REACTOME_SRP_DEPENDENT_COTRANSLATION       | 0.8228177  | 2.348257  | 0         | 0          | 0          |
| REACTOME_3_UTR_MEDIATED_TRANSLATION        | 0.82671034 | 2.3478634 | 0         | 0          | 0          |
| GCM_TPT1                                   | 0.856445   | 2.3263211 | 0         | 0          | 0          |
| REACTOME_INFLUENZA_VIRAL_RNA_TRANSCRIPTION | 0.8275831  | 2.3235037 | 0         | 0          | 0          |
| REACTOME_NONSENSE_MEDIATED_DECAY_OF_MRNA   | 0.8144567  | 2.3197722 | 0         | 0          | 0          |
| STRUCTURAL_CONSTITUENT_OF_RIBOSOME         | 0.8173651  | 2.2617867 | 0         | 0          | 0          |
| BILANGES_SERUM_AND_RAPAMYCIN_SENSITIVITY   | 0.8415251  | 2.256115  | 0         | 0          | 0          |
| REACTOME_TRANSLATION                       | 0.7573706  | 2.2176175 | 0         | 0          | 0          |
| GNF2_EIF3S6                                | 0.7659197  | 2.1851923 | 0         | 0          | 0          |
| REACTOME_FORMATION_OF_THE_TERNARY_COMPLEX  | 0.8296112  | 2.174116  | 0         | 0          | 0          |
| REACTOME_INFLUENZA_LIFE_CYCLE              | 0.75449145 | 2.1721048 | 0         | 0          | 0          |
| GNF2_ST13                                  | 0.785444   | 2.1223912 | 0         | 0          | 0          |
| CHNG_MULTIPLE_MYELOMA_HYPERPLOID_UI        | 0.8040925  | 2.1123197 | 0         | 0          | 0          |
| GNF2_TPT1                                  | 0.85651046 | 2.1089988 | 0         | 0          | 0          |
| MORF_TPT1                                  | 0.7476573  | 2.0991602 | 0         | 0          | 0          |
| REACTOME_ACTIVATION_OF_THE_MRNA_UPSTREAM   | 0.77908516 | 2.095887  | 0         | 0          | 0          |
| MODULE_29                                  | 0.87099814 | 2.083428  | 0         | 0          | 0          |
| GCM_NPM1                                   | 0.73270184 | 2.0820324 | 0         | 0          | 0          |
| GNF2_GLTSCR2                               | 0.8589662  | 2.0524864 | 0         | 0          | 0          |
| MORF_ACTG1                                 | 0.6982923  | 2.0117874 | 0         | 0          | 0          |
| MORF_NPM1                                  | 0.68745464 | 2.0082934 | 0         | 0          | 0          |
| GNF2_FBL                                   | 0.66961443 | 1.9675678 | 0         | 8.23E-05   | 0.002      |
| REACTOME_METABOLISM_OF_MRNA                | 0.65269077 | 1.9490323 | 0         | 7.90E-05   | 0.002      |
| BILANGES_SERUM_RESPONSE_TRANSLATION        | 0.765813   | 1.9243857 | 0         | 1.52E-04   | 0.004      |
| HOLLEMAN_ASPARAGINASE_RESISTANCE_B         | 0.79257584 | 1.9107535 | 0         | 4.02E-04   | 0.011      |
| MORF_JUND                                  | 0.70063734 | 1.8961203 | 0         | 6.34E-04   | 0.018      |
| REACTOME_METABOLISM_OF_RNA                 | 0.6146553  | 1.8456451 | 0         | 0.00210843 | 0.06       |
| TRANSLATION                                | 0.6125013  | 1.8189807 | 0         | 0.00394564 | 0.114      |

|                                       |            |           |            |            |       |
|---------------------------------------|------------|-----------|------------|------------|-------|
| GSE2405_0H_VS_24H_A_PHAGOCYTOPHILUM   | 0.6084147  | 1.8166133 | 0          | 0.00404093 | 0.121 |
| GNF2_DAP3                             | 0.6324597  | 1.8057325 | 0          | 0.00465451 | 0.142 |
| MORF_NME2                             | 0.6180371  | 1.7984093 | 0          | 0.0053802  | 0.167 |
| GSE2405_0H_VS_9H_A_PHAGOCYTOPHILUM_   | 0.60228866 | 1.7975248 | 0          | 0.00530902 | 0.17  |
| CHR11Q11                              | 0.6755318  | 1.7970518 | 0          | 0.00518557 | 0.171 |
| MODULE_83                             | 0.5812919  | 1.7621909 | 0          | 0.01131662 | 0.336 |
| TIEN_INTESTINE_PROBIOTICS_6HR_UP      | 0.65977275 | 1.7475249 | 0          | 0.01482352 | 0.423 |
| STRUCTURAL_MOLECULE_ACTIVITY          | 0.58592355 | 1.7454493 | 0          | 0.01497838 | 0.435 |
| PECE_MAMMARY_STEM_CELL_UP             | 0.5975707  | 1.7446808 | 0          | 0.01477124 | 0.438 |
| GCM_ACTG1                             | 0.6102801  | 1.7434995 | 0          | 0.0148953  | 0.451 |
| LUI_THYROID_CANCER_CLUSTER_3          | 0.71250176 | 1.7223192 | 0          | 0.02285601 | 0.602 |
| FLOTHO_PEDIATRIC_ALL_THERAPY_RESPONS  | 0.6448852  | 1.7111357 | 0          | 0.02750201 | 0.67  |
| POMEROY_MEDULLOBLASTOMA_PROGNOSIS     | 0.65398914 | 1.7056035 | 0          | 0.02993678 | 0.701 |
| YAMASHITA_LIVER_CANCER_WITH_EPCAM_U   | 0.6358509  | 1.6935279 | 0          | 0.03678644 | 0.788 |
| MODULE_151                            | 0.55775696 | 1.6934345 | 0          | 0.03603471 | 0.789 |
| GSE14000_TRANSLATED_RNA_VS_MRNA_DC    | 0.5682297  | 1.693358  | 0          | 0.03529431 | 0.79  |
| GCM_APEX1                             | 0.58865047 | 1.6801664 | 0          | 0.04518152 | 0.875 |
| MORF_EIF3S6                           | 0.5792044  | 1.6773926 | 0          | 0.04664381 | 0.893 |
| BILANGES_RAPAMYCIN_SENSITIVE_VIA_TSC1 | 0.60306114 | 1.6718509 | 0          | 0.05068482 | 0.917 |
| POMEROY_MEDULLOBLASTOMA_DESMOPLAS     | 0.622295   | 1.6709313 | 0          | 0.05049953 | 0.921 |
| MODULE_114                            | 0.55404806 | 1.6702026 | 0          | 0.05014738 | 0.923 |
| MODULE_32                             | 0.5592743  | 1.6692228 | 0          | 0.04999847 | 0.927 |
| GSE41978_ID2_KO_VS_ID2_KO_AND_BIM_KC  | 0.561629   | 1.6688108 | 0          | 0.04940864 | 0.928 |
| GNF2_NPM1                             | 0.6011008  | 1.6640451 | 0.00107181 | 0.05254708 | 0.941 |
| MORF_EIF4A2                           | 0.5714935  | 1.6594828 | 0          | 0.05564504 | 0.953 |
| MYC_UP.V1_UP                          | 0.5573767  | 1.6494309 | 0          | 0.06493662 | 0.975 |
| GCM_CSNK2B                            | 0.5799508  | 1.6403692 | 0          | 0.07461243 | 0.986 |
| GNF2_SPRR1B                           | 0.71056086 | 1.6361141 | 0.0012285  | 0.0791752  | 0.99  |
| RNA_BINDING                           | 0.54184085 | 1.6335474 | 0          | 0.08127637 | 0.993 |
| MCGOWAN_RSP6_TARGETS_UP               | 0.72852594 | 1.6301829 | 0.00125156 | 0.08440943 | 0.996 |
| CARBOHYDRATE_TRANSPORT                | 0.7456734  | 1.6260619 | 0.00483092 | 0.08891249 | 0.996 |

|                                       |            |           |            |            |       |
|---------------------------------------|------------|-----------|------------|------------|-------|
| HALLMARK_MYC_TARGETS_V2               | 0.60538054 | 1.6220471 | 0.00107181 | 0.09361915 | 0.997 |
| GSE42088_UNINF_VS_LEISHMANIA_INF_DC_  | 0.54699755 | 1.621902  | 0          | 0.09233674 | 0.997 |
| REACTOME_METABOLISM_OF_PROTEINS       | 0.5315821  | 1.6207446 | 0          | 0.09240431 | 0.997 |
| MORF_UBE2I                            | 0.5419062  | 1.6204833 | 0          | 0.09146821 | 0.997 |
| SWEET_KRAS_ONCOGENIC_SIGNATURE        | 0.5705057  | 1.6023487 | 0          | 0.12394311 | 1     |
| LUI_THYROID_CANCER_PAX8_PPARG_DN      | 0.60970944 | 1.6021744 | 0.00111732 | 0.12243166 | 1     |
| GSE22886_NAIVE_TCELL_VS_DC_UP         | 0.5423759  | 1.5988914 | 0          | 0.12749194 | 1     |
| JIANG_TIP30_TARGETS_DN                | 0.6939703  | 1.5919838 | 0.00363196 | 0.14093745 | 1     |
| GSE13485_CTRL_VS_DAY7_YF17D_VACCINE_I | 0.54482466 | 1.5904001 | 0          | 0.14267212 | 1     |
| GSE3720_UNSTIM_VS_PMA_STIM_VD2_GAM    | 0.5375035  | 1.5879712 | 0          | 0.14583017 | 1     |
| STEGER_ADIPOGENESIS_DN                | 0.6644432  | 1.5878977 | 0.00238379 | 0.14394176 | 1     |
| MORF_CCNI                             | 0.5654207  | 1.5873467 | 0          | 0.14298345 | 1     |
| IRITANI_MAD1_TARGETS_DN               | 0.5996607  | 1.5854287 | 0          | 0.14550292 | 1     |
| HOLLEMAN_ASPARAGINASE_RESISTANCE_AL   | 0.68996346 | 1.5842619 | 0.00241255 | 0.14632373 | 1     |
| ABE_INNER_EAR                         | 0.60904694 | 1.5826453 | 0.00448934 | 0.14800522 | 1     |
| HOLLEMAN_VINCRISTINE_RESISTANCE_ALL_  | 0.7115724  | 1.5802433 | 0.00369914 | 0.15160392 | 1     |
| CHR4Q35                               | 0.65230995 | 1.5773951 | 0          | 0.15632483 | 1     |
| GSE42724_NAIVE_VS_B1_BCELL_DN         | 0.52969486 | 1.5757798 | 0          | 0.15857798 | 1     |
| GCM_PSME1                             | 0.5596052  | 1.574699  | 0.00210084 | 0.15912314 | 1     |
| GSE22886_NAIVE_BCELL_VS_NEUTROPHIL_U  | 0.53098655 | 1.5729147 | 0          | 0.16130026 | 1     |
| REACTOME_METAL_ION_SLC_TRANSPORTER:   | 0.6686739  | 1.5704443 | 0.00472255 | 0.16591242 | 1     |
| HILLION_HMGA1_TARGETS                 | 0.5547232  | 1.568255  | 0.00105042 | 0.16941547 | 1     |
| CALCIUM_INDEPENDENT_CELL_CELL_ADHESIC | 0.671338   | 1.5652384 | 0.00713436 | 0.1758639  | 1     |
| GSE37532_TREG_VS_TCONV_CD4_TCELL_FRC  | 0.52696645 | 1.5647296 | 0          | 0.1749089  | 1     |
| GSE21927_SPLEEN_C57BL6_VS_4T1_TUMOR_  | 0.5260873  | 1.5619605 | 0          | 0.1803051  | 1     |
| GSE41978_KLRG1_HIGH_VS_LOW_EFFECTOR   | 0.52455604 | 1.5610679 | 0          | 0.1807718  | 1     |
| NAKAYAMA_SOFT_TISSUE_TUMORS_PCA1_D    | 0.566605   | 1.5595582 | 0.00106157 | 0.18265063 | 1     |
| MACROMOLECULE_BIOSYNTHETIC_PROCESS    | 0.5144034  | 1.5585566 | 0          | 0.18364607 | 1     |
| LIPOPROTEIN_BIOSYNTHETIC_PROCESS      | 0.64861053 | 1.558046  | 0.00473373 | 0.18286563 | 1     |
| CHIARADONNA_NEOPLASTIC_TRANSFORMAT    | 0.5855788  | 1.5571196 | 0.00220264 | 0.18334933 | 1     |
| APICOLATERAL_PLASMA_MEMBRANE          | 0.6190701  | 1.5523444 | 0.00800915 | 0.1955924  | 1     |

|                                     |            |           |            |            |   |
|-------------------------------------|------------|-----------|------------|------------|---|
| REACTOME_ABC_FAMILY_PROTEINS_MEDIAT | 0.62543786 | 1.5480615 | 0.00451977 | 0.20623665 | 1 |
| TIGHT_JUNCTION                      | 0.62610644 | 1.5456564 | 0.0079636  | 0.21222499 | 1 |
| CHRX21                              | 0.66182864 | 1.5445017 | 0.00859951 | 0.21370725 | 1 |
| NEWMAN_ERCC6_TARGETS_DN             | 0.613319   | 1.5437745 | 0.00683371 | 0.21402858 | 1 |
| APICAL_JUNCTION_COMPLEX             | 0.6190701  | 1.5434597 | 0.00696056 | 0.2127474  | 1 |
| CHR7Q11                             | 0.5624893  | 1.5428807 | 0          | 0.21237777 | 1 |
| DEVELOPMENT_OF_PRIMARY_SEXUAL_CHAR. | 0.65302175 | 1.5397419 | 0.00358852 | 0.220613   | 1 |
| HE_PTEN_TARGETS_UP                  | 0.70413804 | 1.5394862 | 0.0122549  | 0.21931419 | 1 |

Supplementary Table 2: Genotyping Primers

| <b>Gene</b>     | <b>Sequencing Primers (5' to 3')</b>                                                                                |
|-----------------|---------------------------------------------------------------------------------------------------------------------|
| <i>Cre</i>      | GCT GCC ACG ACC AAG TGA CAG CAA TG<br>GTA GTT ATT CGG ATC ATC AGC CAC AC                                            |
| <i>Kras</i>     | CTA GCC ACC ATG GCT TGA GT<br>TCC GAA TTC AGT GAC TAC AGA TG<br>ATG TCT TTC CCC AGC ACA GT                          |
| <i>Arid1a</i>   | GTA ATG GGA AAG CGA CTA CTG GAG<br>TGT TCA TTT TTG TGG CGG GAG                                                      |
| <i>Tp53</i>     | GGT TAA ACC CAG CTT GAC CA<br>GGA GGC AGA GAC AGT TGG AG                                                            |
| <i>tdTomato</i> | AAG GGA GCT GCA GTG GAG TA<br>CCG AAA ATC TGT GGG AAG TC<br>GGC ATT AAA GCA GCG TAT CC<br>CTG TTC CTG TAC GGC ATG G |

Supplementary Table 3: Primers used for qRT-PCR

| <b>Gene</b>   | <b>Forward Sequence</b> | <b>Reverse Sequence</b>  |
|---------------|-------------------------|--------------------------|
| <i>Ii1b</i>   | GGGCCTCAAAGGAAAGAATC    | TACCAGTTGGGGAACCTCTGC    |
| <i>Ii7</i>    | ATTGCCCGAATAATGAACCA    | TCACCAGTGTTTGTGTGCCT     |
| <i>Tgfb1</i>  | CTGAACCAAGGAGACGGAATAC  | CTGAACCAAGGAGACGGAATAC   |
| <i>Tnfa</i>   | CTGAGGTCAATCTGCCCAAGTAC | CTTCACAGAGCAATGACTCCAAAG |
| <i>Ccl2</i>   | CCCAATGAGTAGGCTGGAGA    | TCTGGACCCATTCTTCTTG      |
| <i>Ccl3</i>   | ATGAAGGTCTCCACCACTGC    | GATGAATTGGCGTGGAATCT     |
| <i>Ccl5</i>   | ATATGGCTCGGACACCACTC    | TCCTTCGAGTGACAAACACG     |
| <i>Fau</i>    | GCCCAGGAACCTACACACC     | AAGCACGACTTGATCTTCGGG    |
| <i>Rps2</i>   | GGGGCTCGTGGAGGTAAAG     | TCTCAGACTCCTTAATGGGCAG   |
| <i>Rps3</i>   | ATGGCGGTGCAGATTTCCAA    | GTAACCTCGGACTTCAACTCCAG  |
| <i>Rps5</i>   | TGGCAGAGACCCCTGACAT     | GGGCAGGTACTTGGCATACT     |
| <i>Rps7</i>   | AGCGCCAAGATCGTGAAGC     | CACCACCAACTTCGATTTCTT    |
| <i>Rps9</i>   | TTGTGCGAAAACCTATGTGACC  | GCCGCCTTACGGATCTTGG      |
| <i>Rps17</i>  | CCAAGACCGTGAAGAAGGCTG   | GCTGGGGATAATGGCGATCT     |
| <i>Rpl11</i>  | ATGGCGCAAGATCAAGGGG     | GACTGTGCAGTGAACAGCAAT    |
| <i>Rpl12</i>  | ACTGGAAGGGTCTCAGAATTACA | TGCCGGGCAATGTTGACAA      |
| <i>Rpl37a</i> | GCTAAACGCACCAAGAAGGTC   | GCCACTGTTTTTCATGCAGGAA   |
